1 Complex and critical roles for the AtrR transcription factor in control of *cyp51A*  
2 expression in *Aspergillus fumigatus*

3

4

5 Sanjoy Paul<sup>1</sup>, Paul E. Verweij<sup>2</sup>, Willem J.G. Melchers<sup>2</sup> and W. Scott Moye-Rowley<sup>1,\*</sup>

6

7 Running title: Complex behavior of *cyp51A* promoter duplications

8

9

10

11

12 From: <sup>1</sup>Department of Molecular Physiology and Biophysics, Carver College of  
13 Medicine, University of Iowa, Iowa City, IA 52242, USA and <sup>2</sup>Department of Medical  
14 Microbiology and Centre of Expertise in Mycology Radboudumc/CWZ, Radboud  
15 University Medical Centre, 6500 HB Nijmegen, The Netherlands.

16

17

18 \*Corresponding author. E-mail: [scott-moye-rowley@uiowa.edu](mailto:scott-moye-rowley@uiowa.edu)

19

20 Manuscript draft: January 26, 2022

21

22

23

24 Abstract (231 words)

25 *Aspergillus fumigatus* is the major filamentous fungal pathogen in humans. The gold  
26 standard treatment of *A. fumigatus* is based on azole drug use but the appearance of  
27 azole-resistant isolates is increasing at an alarming rate. The *cyp51A* gene encodes  
28 the enzymatic target of azole drugs and azole-resistant alleles of *cyp51A* often have an  
29 unusual genetic structure containing a duplication of a 34 or 46 bp region in the  
30 promoter causing enhanced gene transcription. These tandem repeats are called  
31 TR34/TR46 and produce duplicated binding sites for the SrbA and AtrR transcription  
32 factors. Using site-directed mutagenesis, we demonstrate that both the SrbA (sterol  
33 response element: SRE) and AtrR binding sites (AtrR response element: ATRE) are  
34 required for normal *cyp51A* gene expression. Loss of either the SRE or ATRE from the  
35 distal 34 bp repeat of the TR34 promoter (further 5' from the transcription start site)  
36 caused loss of expression of *cyp51A* and decreased voriconazole resistance.  
37 Surprisingly, loss of these same binding sites from the proximal 34 or 46 bp repeat led  
38 to increased *cyp51A* expression and voriconazole resistance. These data indicate that  
39 these duplicated regions in the *cyp51A* promoter function differently. Our findings  
40 suggest that the proximal 34 or 46 bp repeat in *cyp51A* recruits a corepressor that  
41 requires multiple factors to act while the distal repeat is free of this repression and  
42 provides the elevated *cyp51A* expression caused by these promoter duplications.

43

44 Importance (142 words)

45 *Aspergillus fumigatus* is the most common human filamentous fungal pathogen. Azole  
46 drugs are the current therapy of choice for *A. fumigatus* but the prevalence of azole

47 resistance is increasing. The main genetic alteration causing azole resistance is a  
48 change in the *cyp51A* gene that encodes the target of these drugs. Azole-resistant  
49 *cyp51A* alleles routinely contain duplications in their promoter regions that cause  
50 increased gene transcription. Here, we demonstrate that clinical isolates containing a  
51 34 or 46 bp duplication in the *cyp51A* promoter required the presence of the  
52 transcription factor-encoding *atrR* gene to exhibit elevated azole resistance. Elimination  
53 of transcription factor binding sites in the *cyp51A* gene have differential actions on  
54 expression of the resulting mutant allele. These data dissect the molecular inputs to  
55 *cyp51A* transcription and reveal a complicated function of the promoter of this gene that  
56 is critical in azole resistance.

57

58 Results and discussion

59

60 *Aspergillus fumigatus* is the most common cause of mold infections in humans (1).  
61 Azole drugs are currently the first-line therapy for aspergillosis. However, azole-resistant  
62 *A. fumigatus* clinical isolates are being found with increasing frequency and are  
63 associated with a significantly worse clinical outcome (2). Although multiple  
64 mechanisms contribute to azole resistance in *A. fumigatus*, the most commonly  
65 reported genetic change associated with this phenotype are alterations in the gene  
66 encoding *cyp51A*, the target enzyme of azole drugs (3). The most prevalent azole  
67 resistance allele is a compound mutation in *cyp51A* consisting of a 34 bp duplication in  
68 the promoter element (TR34) and a single amino acid replacement in the coding

69 sequence (L98H) (4). Both of these mutations are required for the observed high level  
70 azole resistance conferred by this compound allele (5).

71         Although it is well-established that the TR34 *cyp51A* promoter drives increased  
72 expression of *cyp51A* mRNA compared to the wild-type version (5), we lack a detailed  
73 understanding of how this increased expression is achieved. Previous studies from our  
74 lab and others have demonstrated that several different transcription factors control  
75 transcription of *cyp51A* via the 34 bp region. First, the sterol-responsive SrbA regulator  
76 binds to an element in this 34 bp region called the sterol response element (SRE) and  
77 stimulates expression when sterols are limiting (6, 7). Second, the AtrR transcription  
78 factor binds to a second site within the 34 bp region, referred to as the AtrR response  
79 element (ATRE), to activate transcription (8, 9). Finally, two different negative  
80 transcriptional regulators repress *cyp51A* expression. The CCAAT-binding complex  
81 (CBC) or the iron-responsive transcription factor HapX (10) both reduce *cyp51A*  
82 expression: CBC binds within the 34 bp region while HapX binds just 3' to this segment  
83 (11, 12). The locations of these sites and their positions relative to the 34 bp region are  
84 shown in Supplementary Figure 1A. Note that both the TR34 and TR46 promoters  
85 contains two SREs and ATREs owing to the 34 bp duplication. The CBC binding site is  
86 also duplicated but the HapX response element (HXRE) is not. To distinguish between  
87 these two copies of each site, we refer to them as either the proximal SRE/ATRE  
88 (proximal; closest to transcription start, pSRE/pATRE) or distal SRE/ATRE (distal;  
89 furthest from transcription start, dSRE/dATRE).

90         To evaluate how the ATRE, SRE and HXRE contribute to expression of both  
91 wild-type and TR34 versions of *cyp51A*, site-directed mutations were constructed in

92 these elements (Supplementary Figure 1A) and returned to the natural *cyp51A* genomic  
93 location (Figure 1A). These strains were tested for their ability to grow in the presence  
94 of voriconazole (Figure 1B) and the level of *cyp51A* expression was evaluated by  
95 reverse transcription-quantitative PCR (RT-qPCR) (Figure 1C) or using an anti-Cyp51A  
96 antibody (Supplementary Figure 1B) analyses.

97       Loss of either the pSRE (mpSRE) or the pATRE (mpATRE) from wild-type  
98 *cyp51A* caused a slight (mpSRE) or a large increase (mpATRE) in voriconazole  
99 susceptibility (Figure 1B). Removal of the HXRE led to a large decrease in voriconazole  
100 susceptibility. These resistance data were fully consistent with the observed expression  
101 changes seen by either RT-qPCR measurements (Figure 1C) or western blotting  
102 (Supplementary Figure 1B). Loss of the ATRE from the wild-type *cyp51A* promoter  
103 caused such profound hypersensitivity to voriconazole that we were unable to recover  
104 sufficient fungus to assay expression. Together, these data are consistent with both the  
105 SRE and ATRE acting as positive regulatory elements and the HXRE acting as a  
106 negative element to control *cyp51A* expression and function.

107       Insertion of the TR34 promoter into the *cyp51A* locus led to a decrease in  
108 voriconazole susceptibility as seen before (4, 13). Strikingly, loss of either the pSRE or  
109 the pATRE from TR34 *cyp51A* led to a large decrease in voriconazole susceptibility  
110 (Figure 1B). This decrease in voriconazole susceptibility was accompanied by a large  
111 increase in the level of Cyp51A expression (Figure 1C, Supplementary Figure 1B).  
112 Behavior of each of these proximal element mutations was similar to that caused by  
113 loss of the HXRE from TR34 *cyp51A*. Although these proximal binding sites clearly  
114 work as primarily as positive elements in the wild-type promoter context, they appear to

115 be involved in repression in the TR34 promoter as their loss leads to a large increase in  
116 *cyp51A* expression. Conversely, loss of either of the distal elements (dSRE or dATRE)  
117 caused an increase in voriconazole susceptibility, along with a decrease in expression  
118 and loss of voriconazole inducibility of *cyp51A* mRNA (Figure 1C) consistent with these  
119 binding sites acting as positive sites determining TR34 promoter function.

120 We also produced proximal ATRE and SRE mutant forms of the TR46 *cyp51A*  
121 gene to determine if the unexpected behavior of these elements would extend to this  
122 different promoter context. TR46 corresponds to duplication of 46 bases with an  
123 identical 5' endpoint to TR34 and additional 12 bp at the 3' end (14). As seen for their  
124 counterparts in the TR34 promoter, loss of either the proximal SRE or ATRE caused a  
125 decrease in voriconazole susceptibility and an increase in expression compared to the  
126 starting TR46 promoter-containing strain.

127 These data indicate that the increased Cyp51A expression and reduced  
128 voriconazole susceptibility caused by the TR34 or TR46 promoters cannot be explained  
129 simply by the increased dosage of the duplicated regions present. The proximal and  
130 distal regions have distinct behaviors in the TR34 promoter context and likely in the  
131 TR46 promoter as well. The distal 34 bp region behaves strictly as a positive regulator  
132 of *cyp51A* transcription while the proximal element exhibits a negative effect when  
133 present in the TR34 promoter. This is quite surprising since loss of the pATRE from the  
134 wild-type *cyp51A* promoter yields a strain that cannot grow in the presence of  
135 voriconazole. These same behaviors are seen for the pSRE, although this strain grew,  
136 albeit slowly, in the presence of voriconazole.

137           Given the important role of AtrR in control of *cyp51A* promoter function, we  
138 compared the requirement for this factor in voriconazole resistance and Cyp51A  
139 expression in wild-type and isogenic TR34 *cyp51A* laboratory strains. We also  
140 examined the effect of loss of AtrR in two different clinical strains containing either a  
141 TR34 promoter-driven *cyp51A* gene or a TR46 *cyp51A* locus. Each of the clinical  
142 isolates tested is associated with different mutant forms of Cyp51A. The *atrR* gene was  
143 disrupted in all these 4 strains using CRISPR/cas9 and isogenic *atrR* and *atrR* $\Delta$   
144 derivatives tested for voriconazole susceptibility (Figure 2A) and expression of Cyp51A  
145 by western blotting (Figure 2B).

146           The presence of AtrR was essential for the normal high level voriconazole  
147 resistance seen in both clinical isolates, irrespective of the TR34 or TR46 nature of the  
148 *cyp51A* promoter. The overexpression of Cyp51A was also eliminated from these  
149 strains when the *atrR* was deleted.

150           Together, these data illustrate the unexpected complexity of the TR34 promoter  
151 region in *cyp51A* expression. We argue that a simple increase in dosage of a positively  
152 acting region of 34 bp cannot explain the unique behavior of the TR34 promoter. The  
153 distal 34 bp repeat behaves positively but the proximal 34 bp repeat has a strong  
154 negative effect on TR34 promoter activity. We hypothesize the presence of a  
155 multivalent corepressor (Figure 2C) that must be engaged by SrbA and AtrR, along with  
156 CBC and HapX to normally repress *cyp51A* transcription. A single transcription factor  
157 acting as both a repressor or activator has been extensively documented for  
158 mammalian nuclear receptors (15). Loss of the binding sites for SrbA or AtrR strongly  
159 activate *cyp51A* expression in the absence of drug induction but only in the context of a

160 duplication of the *cyp51A* promoter. Importantly, neither the TR34 or TR46 duplication  
161 includes both the CBC and HapX binding sites, suggesting that these must be lost in  
162 order to provide the proper context for the upstream repeat to induce *cyp51A*  
163 expression. In the wild-type *cyp51A* promoter, mutations in either the SRE or the ATRE  
164 cannot hyperactivate since these elements are also required for normal expression.  
165 AtrR is required for voriconazole resistance and Cyp51A overproduction from TR34 and  
166 TR46 promoter-driven *cyp51A* genes and, as seen earlier with *SrbA* (16), AtrR is a  
167 crucial determinant for azole resistance in clinical isolates of *A. fumigatus*.

168

#### 169 Literature cited

- 170 1. Brown GD, Denning DW, Gow NA, Levitz SM, Netea MG, White TC. 2012. Hidden killers:  
171 human fungal infections. *Sci Transl Med* 4:165rv13.
- 172 2. Lestrade PPA, Meis JF, Melchers WJG, Verweij PE. 2019. Triazole resistance in  
173 *Aspergillus fumigatus*: recent insights and challenges for patient management. *Clin*  
174 *Microbiol Infect* 25:799-806.
- 175 3. Wiederhold NP, Verweij PE. 2020. *Aspergillus fumigatus* and pan-azole resistance: who  
176 should be concerned? *Curr Opin Infect Dis* 33:290-297.
- 177 4. Snelders E, van der Lee HA, Kuijpers J, Rijs AJ, Varga J, Samson RA, Mellado E, Donders  
178 AR, Melchers WJ, Verweij PE. 2008. Emergence of azole resistance in *Aspergillus*  
179 *fumigatus* and spread of a single resistance mechanism. *PLoS Med* 5:e219.
- 180 5. Snelders E, Karawajczyk A, Verhoeven RJ, Venselaar H, Schaftenaar G, Verweij PE,  
181 Melchers WJ. 2011. The structure-function relationship of the *Aspergillus*  
182 *fumigatus* *cyp51A* L98H conversion by site-directed mutagenesis: the mechanism of  
183 L98H azole resistance. *Fungal Genet Biol* 48:1062-70.
- 184 6. Chung D, Barker BM, Carey CC, Merriman B, Werner ER, Lechner BE, Dhingra S, Cheng C,  
185 Xu W, Blosser SJ, Morohashi K, Mazurie A, Mitchell TK, Haas H, Mitchell AP, Cramer RA.  
186 2014. CHIP-seq and in vivo transcriptome analyses of the *Aspergillus fumigatus* SREBP  
187 *SrbA* reveals a new regulator of the fungal hypoxia response and virulence. *PLoS Pathog*  
188 10:e1004487.
- 189 7. Gsaller F, Hortschansky P, Furukawa T, Carr PD, Rash B, Capilla J, Muller C, Bracher F,  
190 Bowyer P, Haas H, Brakhage AA, Bromley MJ. 2016. Sterol Biosynthesis and Azole  
191 Tolerance Is Governed by the Opposing Actions of *SrbA* and the CCAAT Binding Complex.  
192 *PLoS Pathog* 12:e1005775.
- 193 8. Hagiwara D, Miura D, Shimizu K, Paul S, Ohba A, Gono T, Watanabe A, Kamei K, Shintani  
194 T, Moye-Rowley WS, Kawamoto S, Gomi K. 2017. A Novel Zn<sup>2</sup>-Cys<sup>6</sup> Transcription Factor



- 195 AtrR Plays a Key Role in an Azole Resistance Mechanism of *Aspergillus fumigatus* by Co-  
196 regulating *cyp51A* and *cdr1B* Expressions. *PLoS Pathog* 13:e1006096.
- 197 9. Paul S, Stamnes M, Thomas GH, Liu H, Hagiwara D, Gomi K, Filler SG, Moye-Rowley WS.  
198 2019. AtrR Is an Essential Determinant of Azole Resistance in *Aspergillus fumigatus*.  
199 *MBio* 10.
- 200 10. Gsaller F, Hortschansky P, Beattie SR, Klammer V, Tuppatsch K, Lechner BE, Rietzschel N,  
201 Werner ER, Vogan AA, Chung D, Muhlenhoff U, Kato M, Cramer RA, Brakhage AA, Haas  
202 H. 2014. The Janus transcription factor HapX controls fungal adaptation to both iron  
203 starvation and iron excess. *EMBO J* 33:2261-76.
- 204 11. Hortschansky P, Ando E, Tuppatsch K, Arikawa H, Kobayashi T, Kato M, Haas H, Brakhage  
205 AA. 2015. Deciphering the combinatorial DNA-binding code of the CCAAT-binding  
206 complex and the iron-regulatory basic region leucine zipper (bZIP) transcription factor  
207 HapX. *J Biol Chem* 290:6058-70.
- 208 12. Furukawa T, Scheven MT, Misslinger M, Zhao C, Hoefgen S, Gsaller F, Lau J, Jochl C,  
209 Donaldson I, Valiante V, Brakhage AA, Bromley MJ, Haas H, Hortschansky P. 2020. The  
210 fungal CCAAT-binding complex and HapX display highly variable but evolutionary  
211 conserved synergetic promoter-specific DNA recognition. *Nucleic Acids Res* 48:3567-  
212 3590.
- 213 13. Paul S, Diekema D, Moye-Rowley WS. 2013. Contributions of *Aspergillus fumigatus* ATP-  
214 binding cassette transporter proteins to drug resistance and virulence. *Eukaryot Cell*  
215 12:1619-28.
- 216 14. Snelders E, Camps SM, Karawajczyk A, Rijs AJ, Zoll J, Verweij PE, Melchers WJ. 2015.  
217 Genotype-phenotype complexity of the TR46/Y121F/T289A *cyp51A* azole resistance  
218 mechanism in *Aspergillus fumigatus*. *Fungal Genet Biol* 82:129-35.
- 219 15. Lonard DM, O'Malley B W. 2007. Nuclear receptor coregulators: judges, juries, and  
220 executioners of cellular regulation. *Mol Cell* 27:691-700.
- 221 16. Hagiwara D, Watanabe A, Kamei K. 2016. Sensitisation of an Azole-Resistant *Aspergillus*  
222 *fumigatus* Strain containing the Cyp51A-Related Mutation by Deleting the *SrbA* Gene.  
223 *Sci Rep* 6:38833.
- 224 17. Hortschansky P, Misslinger M, Morl J, Gsaller F, Bromley MJ, Brakhage AA, Groll M, Haas  
225 H, Huber EM. 2020. Structural basis of HapE(P88L)-linked antifungal triazole resistance  
226 in *Aspergillus fumigatus*. *Life Sci Alliance* 3.
- 227 18. Al Abdallah Q, Ge W, Fortwendel JR. 2017. A Simple and Universal System for Gene  
228 Manipulation in *Aspergillus fumigatus*: In Vitro-Assembled Cas9-Guide RNA  
229 Ribonucleoproteins Coupled with Microhomology Repair Templates. *mSphere* 2.

231

232

233 Figure Legends

234

235 **Figure 1. Analysis of *cyp51A* promoter function.** A. Schematic diagram of  
236 integration of wild-type and mutant *cyp51A* promoter mutants. All mutants analyzed  
237 here were reintroduced back at the native *cyp51A* chromosomal location. The relative  
238 location of the TR repeat regions is indicated as a box with the two exons of *cyp51A*  
239 also noted. The hygromycin selection marker (Hyg cassette) is located downstream of  
240 the native 3' end of the *cyp51A* mRNA. B. Disk diffusion assay of mutant forms of the  
241 *cyp51A* promoter. A filter disk containing 0.01 mg of voriconazole was placed in the  
242 center of  $10^6$  spores of each indicated strain and allowed to grow at 37° C for 72 hrs. C.  
243 Strains containing the listed versions of either the wild-type (left hand side) or TR34  
244 (right hand side) *cyp51A* gene were grown to mid-log phase with (+) or without (-)  
245 voriconazole treatment. Transcriptional behavior of each mutant promoter was  
246 assessed by qRT-PCR relative to the *tef1* gene. Data are presented for the average of  
247 two independent experiments. Numbers above each bar represent the average fold  
248 increase for each strain in the presence or absence of voriconazole.

249

250 **Figure 2. AtrR is essential for voriconazole resistance in laboratory and clinical**  
251 **strains.** A. Isogenic *atrR* and *atrRΔ* derivatives of the indicated strains were tested for  
252 voriconazole resistance by disk diffusion assay. B. Western blot analysis of the strains  
253 listed above was performed using the anti-Cyp51A antiserum. Note that the L98H-  
254 containing enzymes electrophorese very close to a nonspecific background signal as  
255 we showed earlier (13). The Y121F T289A Cyp51A is clearly resolved below this  
256 background polypeptide. C. Diagram for potential roles of trans- and cis-acting factors  
257 at wild-type and TR34 *cyp51A* promoters. A hypothetical corepressor is pictured that

258 makes multivalent contacts with the key regulators of *cyp51A* transcription. Note the  
259 proximal ATRE is indicated as the red crosshatched box. Other binding sites are color-  
260 coded with their respective regulators. Azole drugs trigger corepressor dissociation and  
261 gene activation. In the case of the TR34 promoter (right hand panels), the distal SRE  
262 and ATRE in the upstream 34 bp repeat can bypass corepressor function and activate  
263 transcription. The 34 (and 46) bp tandem repeats do not include the HXRE but maintain  
264 a CBC binding site. Interaction of CBC with the adjacent HXRE is required for strong  
265 binding of these factors (17). Exposure of the TR34 *cyp51A* gene to azole drugs or loss  
266 of the pSRE or pATRE (shown here) trigger strong induction of expression. Induction of  
267 expression in the mpATRE TR34 promoter is maximal even in the absence of azole  
268 induction. Only TR34 is shown but we believe the same mechanisms operate for the  
269 TR46 promoter.

270

271 Supplementary Figures and Material and Methods

272

273 **Supplementary Figure 1. Detailed map of *cyp51A* promoter mutations and analysis**  
274 **of Cyp51A protein levels in response to these alterations.** A. The DNA sequence  
275 of the *cyp51A* promoter region of interest in this study is shown. The wild-type promoter  
276 is shown on the top and the TR34 equivalent is shown on the bottom. Location of the  
277 core binding elements for each transcription are indicated below the DNA sequences.  
278 Mutant bases are shown in red lettering in each site. Extent of the 34 bp repeat is  
279 shown by the gray highlighting. B. Whole cell protein extracts were prepared and  
280 analyzed by western blotting using the anti-Cyp51A antiserum (13). Strains lacking the

281 pATRE in the wild-type *cyp51A* promoter context were unable to be grown in the  
282 presence of voriconazole and are absent from that analysis. Lanes are numbered at  
283 the top of each panel and the numbers near each Cyp51A polypeptide correspond to  
284 the quantitation for this experiment.

285

## 286 Materials and Methods

287 **Strains & growth conditions.** The lab strains used in this study were derived from the  
288 AfS35 (FGSC #A1159). Strains used here are listed in Table 1. *A. fumigatus* strains  
289 were typically grown at 37°C in rich medium (Sabouraud dextrose: 0.5% tryptone, 0.5%  
290 peptone, 2% dextrose [pH 5.6]). Selection of transformants and the drug disc diffusion  
291 assay was performed in minimal medium (MM: 1% glucose, nitrate salts, trace  
292 elements, 2% agar [pH 6.5]); trace elements, vitamins, and nitrate salts, supplemented  
293 with 1% sorbitol and either 200 mg/liter hygromycin Gold (InvivoGen) or 0.1 mg/litre  
294 pyrithiamine. For solid medium, 1.5% agar was added.

295

296 **Transformation and generation of *A. fumigatus cyp51A* mutants.** The plasmid  
297 backbone for generating *A. fumigatus cyp51A* promoter mutants was provided by  
298 Eveline Snelders and colleagues. This plasmid has a wild-type *cyp51A* promoter, gene  
299 and transcription terminator followed by a hygromycin resistance cassette (hph) and 1.3  
300 kb downstream of *cyp51A* for homologous targeted integration (5). The specific *cyp51A*  
301 promoter mutations were synthesized as DNA fragments and obtained from GenScript  
302 USA Inc. The DNA fragments were then subcloned into the vector backbone by  
303 digesting the vector and synthesized DNA fragments with PmlI and BglII. SRE, ATRE

304 and HXRE mutations were marked with HindIII, SpeI and BamHI restriction sites,  
305 respectively. The recombinant plasmids were verified by PCR amplifying a 1kb region  
306 around the mutation sites, and restriction digests using the appropriate restriction  
307 enzymes. The recombinant plasmids carrying the different *cyp51A* promoters were  
308 digested with PmlI and PstI to release the *cyp51A* promoter-gene-hph cassette for  
309 transformation. The list of plasmids used for this study is listed in Table 2.

310

311 Transformation was performed using in vitro-assembled cas9-guide RNA-  
312 ribonucleoproteins coupled with 50 bp microhomology repair templates (18).  
313 Transformants with targeted integration were confirmed by diagnostic PCR of the novel  
314 downstream junction as well as by PCR amplification and subsequent sequencing of the  
315 *cyp51A* promoter region to confirm the integrity of the promoter region duplication  
316 and/or mutation. The single copy nature of *cyp51A* in the targeted integrants was  
317 confirmed using qRT-PCR, as described in (13).

318

319 **Drug Disc Diffusion Assay.** Fresh spores of *A. fumigatus* were suspended in 1X  
320 phosphate-buffered saline (PBS) supplemented with 0.01% Tween 20 (1X PBST). The  
321 spore suspension was counted using a hemocytometer to determine the spore  
322 concentration. Spores were then appropriately diluted in 1X PBST. For the drug  
323 diffusion assay,  $\sim 10^6$  spores were mixed with 10 ml soft agar (0.7%) and poured over  
324 15 ml regular agar (1.5%) containing minimal medium. A sterile paper disk was placed  
325 on the center of the plate, and 10  $\mu$ l of 2 mg/liter voriconazole was spotted onto the filter  
326 paper for analysis of wild-type and TR34 promoter mutant-containing strains. The same

327 protocol was followed by 10  $\mu$ l of 3.2 mg/liter voriconazole was spotted onto the filter  
328 disk for the analysis of the TR46 promoter-containing strains. The plates were incubated  
329 at 37°C and scanned after 72 hours.

330

331 **Western Blotting.** Western blotting was performed as described in (13). The Cyp51A  
332 peptide polyclonal antibody used here has been detailed in the reference above, and  
333 was used at a 1:500 dilution.

334

335 **Measurement of mRNA level.** Reverse transcription quantitative PCR (RT-qPCR) was  
336 performed as described in reference (13), with the following modification. The Ct value  
337 of the gene coding for *tef1* was used for normalization of variable cDNA levels to  
338 determine the fold difference in transcript levels with respect to *cyp51A*.

339

340 **TABLE 1.** *A. fumigatus* strains used in this study

| 341 | <b>Strain</b> | <b>Parent</b> | <b>Genotype</b>                | <b>Source or reference</b> |
|-----|---------------|---------------|--------------------------------|----------------------------|
| 342 | V232-12       |               | TR34 L98H T289A <i>cyp51A</i>  | W. Melchers                |
| 343 | SPF169        | V232-12       | <i>atrRΔ::ptrA</i>             | This study                 |
| 344 | V181-51       |               | TR46 Y121F T289A <i>cyp51A</i> | W. Melchers                |
| 345 | SPF169        | V181-51       | <i>atrRΔ::ptrA</i>             | This study                 |
| 346 | AfS35         | D141          | <i>akuA::loxP</i>              | FGSC                       |
| 347 | SPF92         | AfS35         | wt <i>cyp51A</i> hph           | (13)                       |
| 348 | SPF200        | AfS35         | mSRE <i>cyp51A</i> hph         | This study                 |
| 349 | SPF202        | AfS35         | mATRE <i>cyp51A</i> hph        | This study                 |
| 350 | SPF204        | AfS35         | mHXRE <i>cyp51A</i> hph        | This study                 |
| 351 | SPF94         | AfS35         | TR34 <i>cyp51A</i> hph         | (13)                       |
| 352 | SPF206        | AfS35         | mdSRE TR34 <i>cyp51A</i> hph   | This study                 |
| 353 | SPF208        | AfS35         | mdATRE TR34 <i>cyp51A</i> hph  | This study                 |
| 354 | SPF210        | AfS35         | mHXRE TR34 <i>cyp51A</i> hph   | This study                 |
| 355 | SPF212        | AfS35         | mpSRE TR34 <i>cyp51A</i> hph   | This study                 |
| 356 | SPF214        | AfS35         | mpATRE TR34 <i>cyp51A</i> hph  | This study                 |

357

358

359 **TABLE 2.** Plasmids used in this study

| 360 | <b>Plasmid</b> | <b>Parent</b> | <b>Genotype</b>               | <b>Source or reference</b> |
|-----|----------------|---------------|-------------------------------|----------------------------|
| 361 | A1             | pUC57         | wt <i>cyp51A</i> hph          | (5)                        |
| 362 | pSP119         | A1            | mSRE <i>cyp51A</i> hph        | This study                 |
| 363 | pSP120         | A1            | mATRE <i>cyp51A</i> hph       | This study                 |
| 364 | pSP121         | A1            | mHXRE <i>cyp51A</i> hph       | This study                 |
| 365 | L5H            | pUC57         | TR34 <i>cyp51A</i> hph        | (5)                        |
| 366 | pSP122         | A1            | mdSRE TR34 <i>cyp51A</i> hph  | This study                 |
| 367 | pSP123         | A1            | mdATRE TR34 <i>cyp51A</i> hph | This study                 |
| 368 | pSP124         | A1            | mHXRE TR34 <i>cyp51A</i> hph  | This study                 |
| 369 | SPF125         | A1            | mpSRE TR34 <i>cyp51A</i> hph  | This study                 |
| 370 | SPF126         | A1            | mpATRE TR34 <i>cyp51A</i> hph | This study                 |

371

372

373

374

375



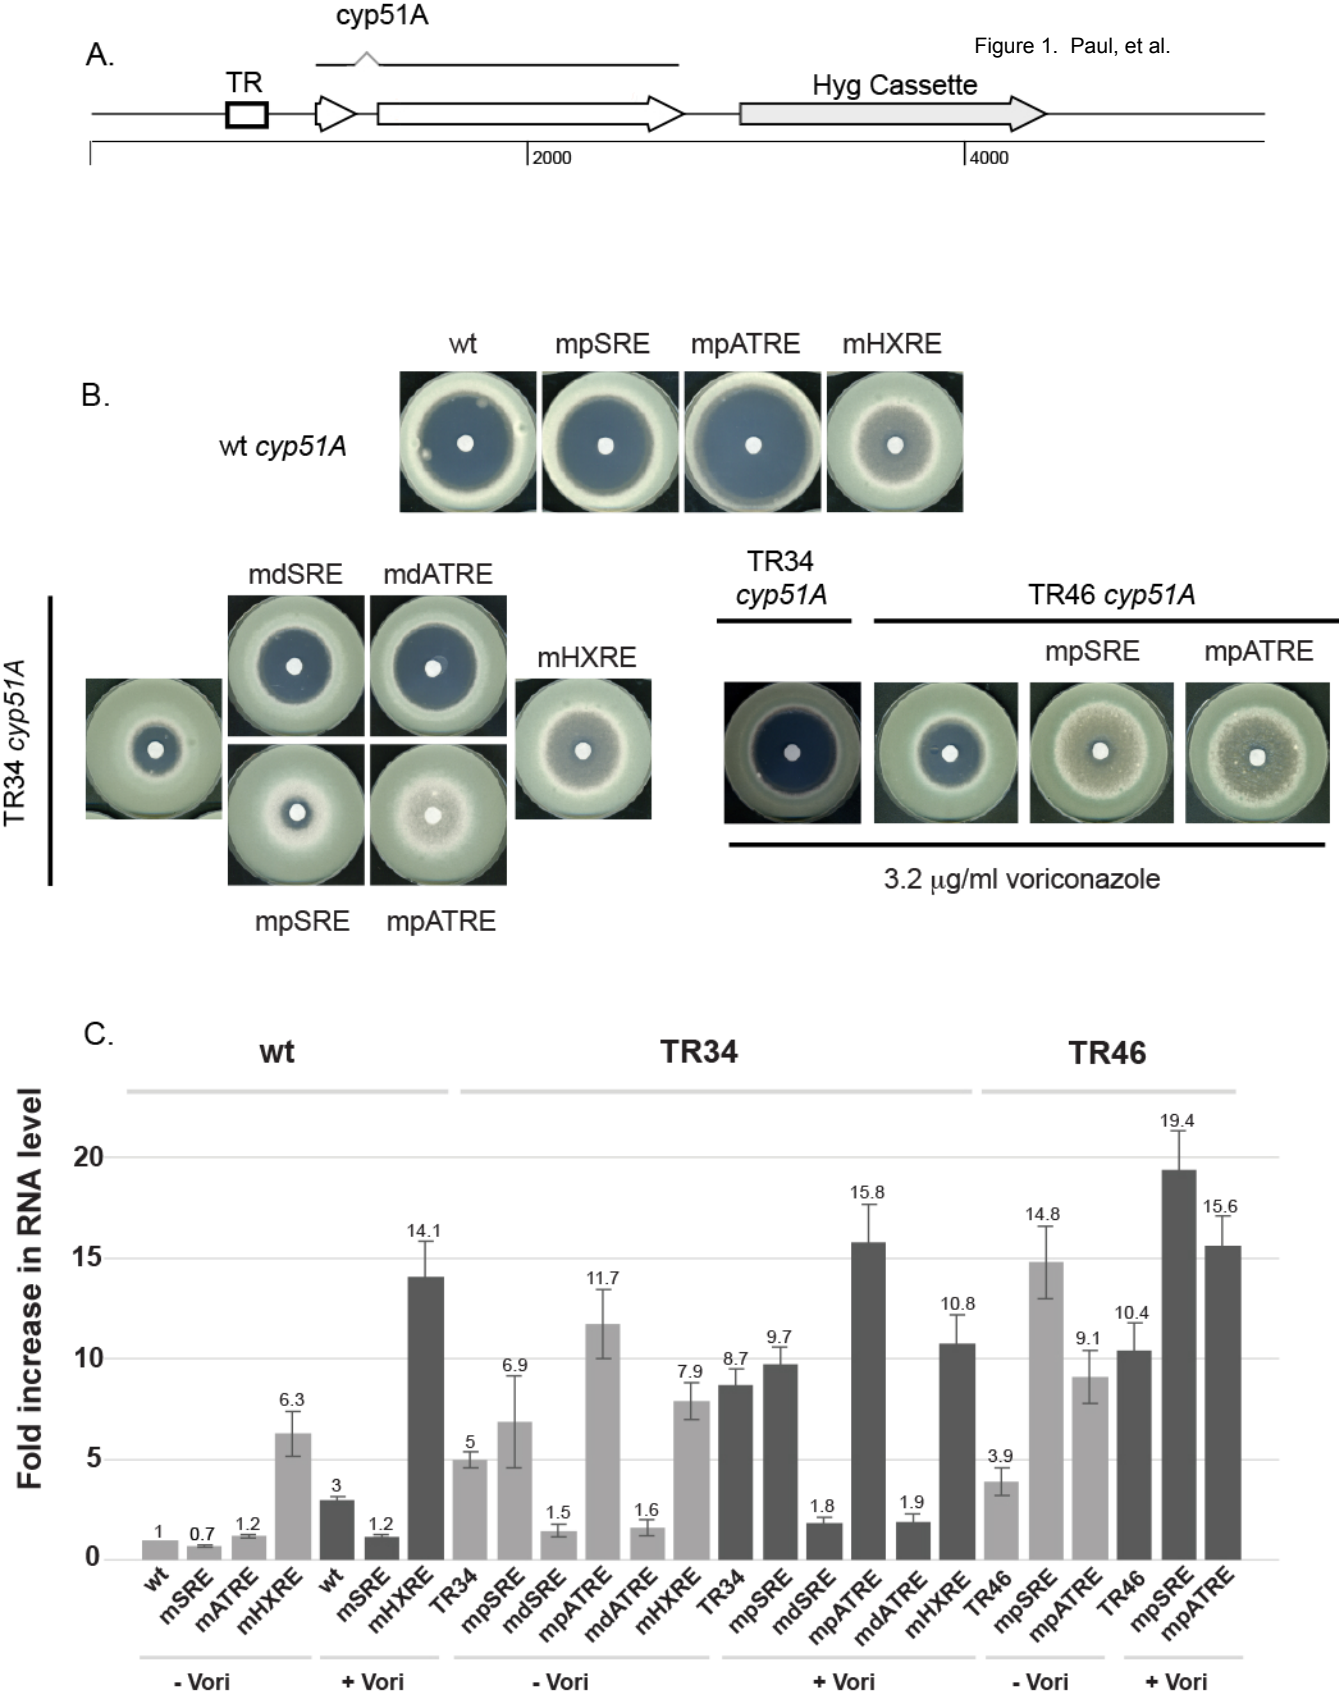

A.

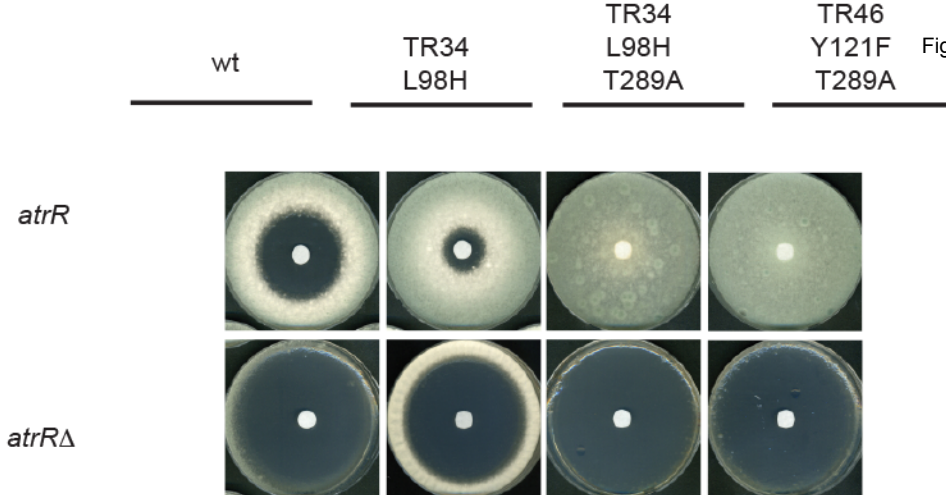

B.

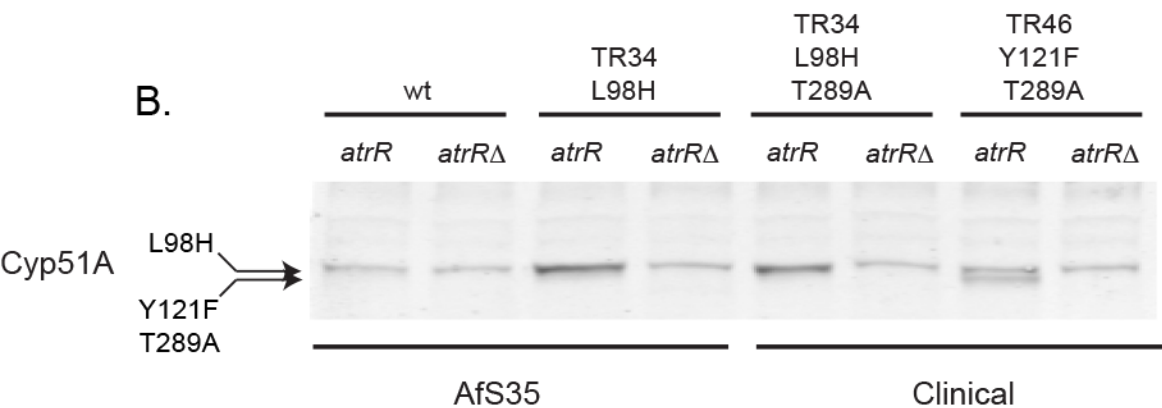

C.

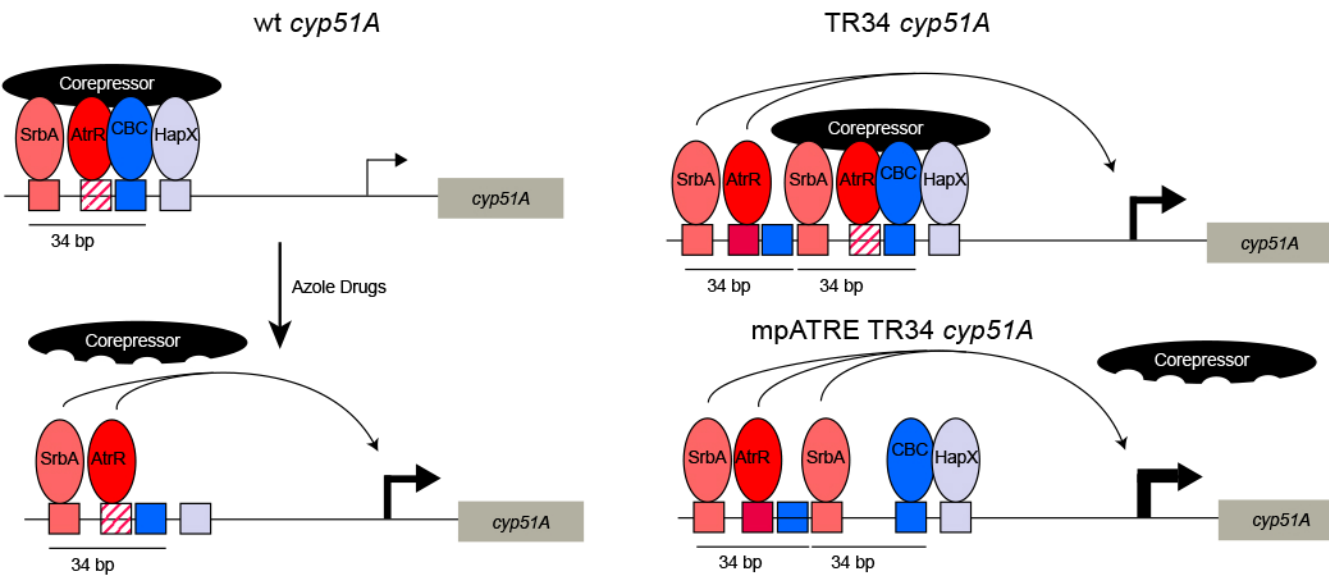

A.

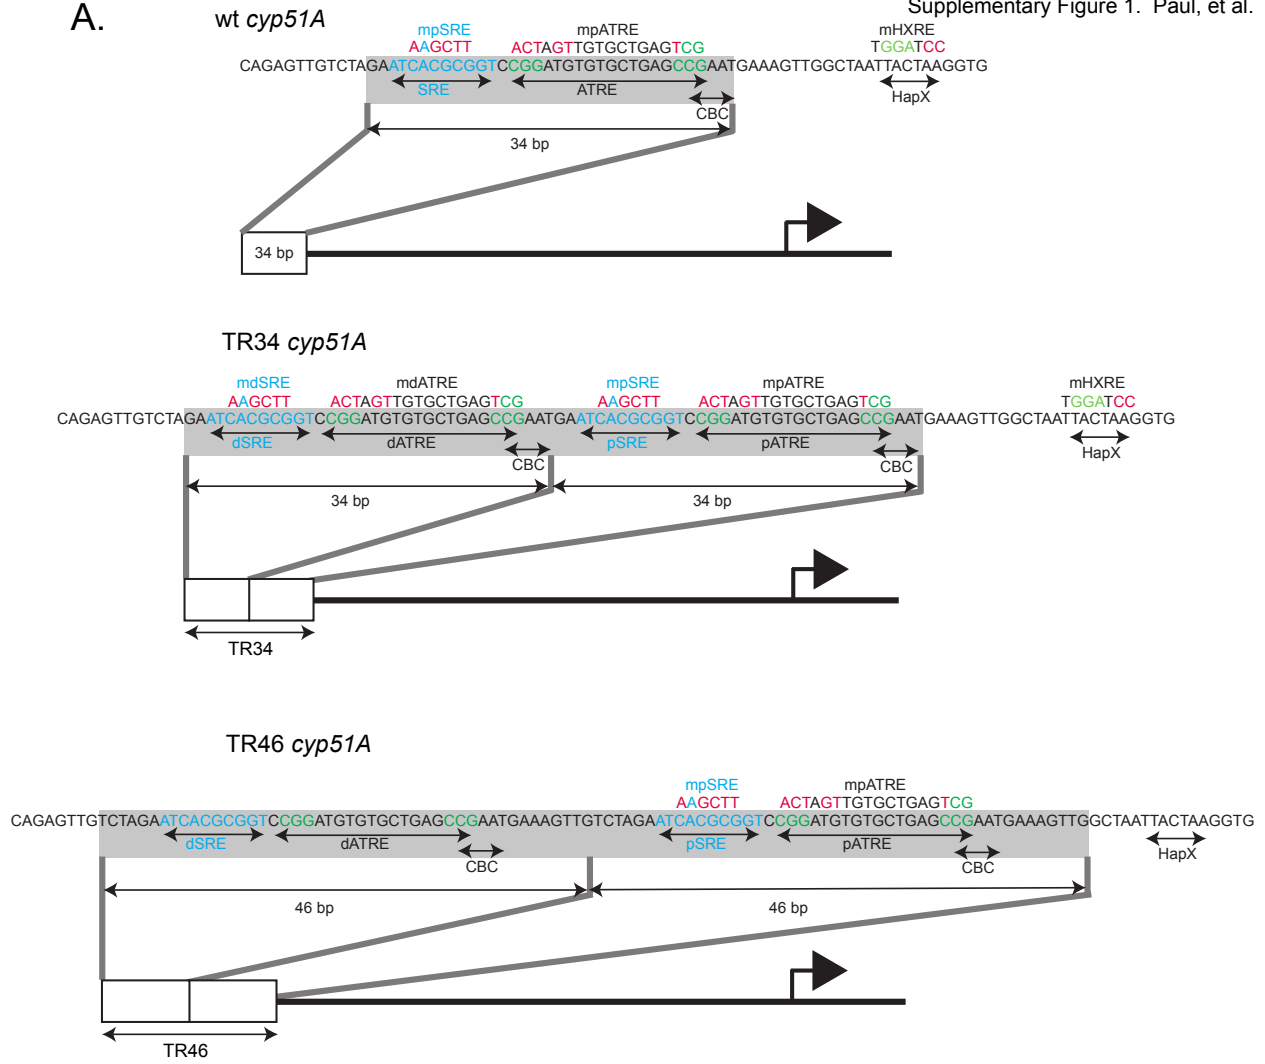

B.

**wt *cyp51A***

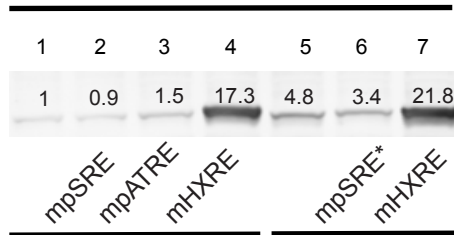

**TR34 *cyp51A***

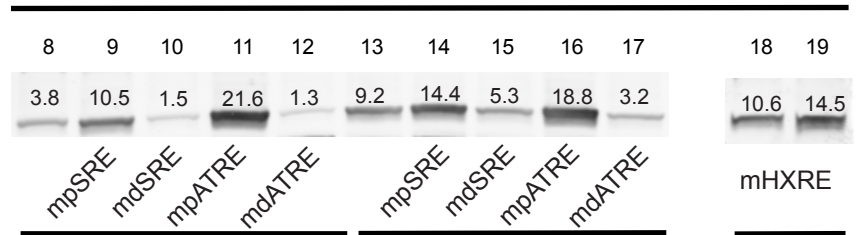

Voriconazole

-

+

-

+

-

+

-

+

**TR46 *cyp51A***

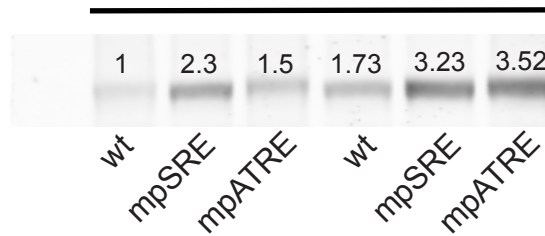

- Voriconazole

- Voriconazole
